# Supplementary material for: Cheminformatics Modeling of Gene Silencing for Both Natural and Chemically Modified siRNAs
Source: MDPI journal article supplement (doi:10.3390/molecules27196412), 2022-09-28
Supplement: s1 [file s1]

**This folder contains data files related to the Huesken dataset and its modeling**

**ACGUT\_bcuts**

- The calculated BCUT values for all five natural nucleotides

**Huesken\_ID-21ntSeq-NormAct\_2431**

- ID, potency and siRNA sequence

**Huesken-train-test-values-9-27-2022**

- ID, potency, 252 BCUT values and predicted potencies for the training set, shown in the last 2153 rows, and test set shown in the first 278 rows of this spreadsheet.

**rational\_split.cpp**

- The CPP code for conducting splitting
