# Supplementary material for: Cheminformatics Modeling of Gene Silencing for Both Natural and Chemically Modified siRNAs
Source: MDPI journal article supplement (doi:10.3390/molecules27196412), 2022-09-28
Supplement: s1 [file s1]

**This folder contains data files related to the Bramsen dataset and its modeling**

SMILES structures and their ID used for all the chemically modified nucleotides used in the Bramsen paper -

**Bramsen\_modified\_nts\_struct\_xl**

Three pairs of training and test datasets (siRNA ID, potency and BCUT values) -

**Bramsen\_train4\_forModel1 and Bramsen\_test4,**

**Bramsen\_train10\_forModel2 and Bramsen\_test10,**

**Bramsen\_train22\_forModel3 and Bramsen\_test22**

Three pairs of predicted and actual potency -

**Bramsen\_corr\_plot\_train\_model\_set04\_04**

**Bramsen\_corr\_plot\_test\_model\_set04\_04;**

**Bramsen\_corr\_plot\_train\_model\_set10\_04**

**Bramsen\_corr\_plot\_test\_model\_set10\_04;**

**Bramsen\_corr\_plot\_train\_model\_set22\_04**

**Bramsen\_corr\_plot\_test\_model\_set22\_04.**

BCUT values of all the chemically modified siRNAs used in the Bramsen paper -

**Bramsen\_xl\_modified\_nts\_bcuts**

Original IDs, potency (eGlogP), and siRNA sequences used in Bramsen paper -

**modified\_siRNA\_AS\_Bramsen\_xl\_dataset**
